# Supplementary material for: Structure, stability, electronic and magnetic properties of Ni4 clusters containing impurity atoms
Source: Royal Society of Chemistry journal article supplement (doi:10.1039/b518175e), 2006-01-01
Supplement: b518175e.pdf [file b518175e.pdf]

# Structure, stability, electronic and magnetic properties of Ni<sub>4</sub> clusters containing impurity atoms

Petko St. Petkov,<sup>1</sup> Georgi N. Vayssilov,<sup>1\*</sup> Sven Krüger,<sup>2</sup> and Notker Rösch<sup>2\*</sup>

<sup>1</sup> Faculty of Chemistry, University of Sofia, 1126 Sofia, Bulgaria,  
e-mail: gnv@chem.uni-sofia.bg

<sup>2</sup> Department Chemie, Technische Universität München, 85747 Garching, Germany,  
e-mail: roesch@ch.tum.de

## ELECTRONIC SUPPLEMENTARY INFORMATION

**Table S1.** BE of impurity atoms in symmetric positions on a Ni<sub>4</sub> cluster. Structures in bold are reported in the text, while the other structures do not correspond to local minima. For notation of the structures see Fig. S1.

| Complex                                                 | BE (kJ/mol) |            |            |
|---------------------------------------------------------|-------------|------------|------------|
|                                                         | H           | O          | C          |
| (μ <sub>4</sub> -X)Ni <sub>4</sub> /T <sub>d</sub>      | 76          | 198        | 516        |
| (?-X)Ni <sub>4</sub> /C <sub>3v</sub>                   | 207         | 320        | 363        |
| (μ <sub>4</sub> -X)Ni <sub>4</sub> /C <sub>3v</sub>     | 98          | 324        | 593        |
| (μ <sub>3</sub> -X)Ni <sub>4</sub> /C <sub>3v</sub>     | 250         | 430        | <b>629</b> |
| (μ <sub>4</sub> -X)Ni <sub>4</sub> /C <sub>2v</sub>     | -           | 359        | <b>640</b> |
| (μ-X)Ni <sub>4</sub> /C <sub>2v</sub>                   | <b>286</b>  | <b>455</b> | -          |
| (μ <sub>4</sub> -X)Ni <sub>4</sub> /D <sub>4h</sub>     | 161         | 267        | 610        |
| (μ <sub>4</sub> -X)Ni <sub>4</sub> /C <sub>4v</sub>     | 161         | 279        | 610        |
| (μ <sub>4</sub> -X)Ni <sub>4</sub> /C <sub>2v</sub> -pl | -           | 383        | <b>628</b> |

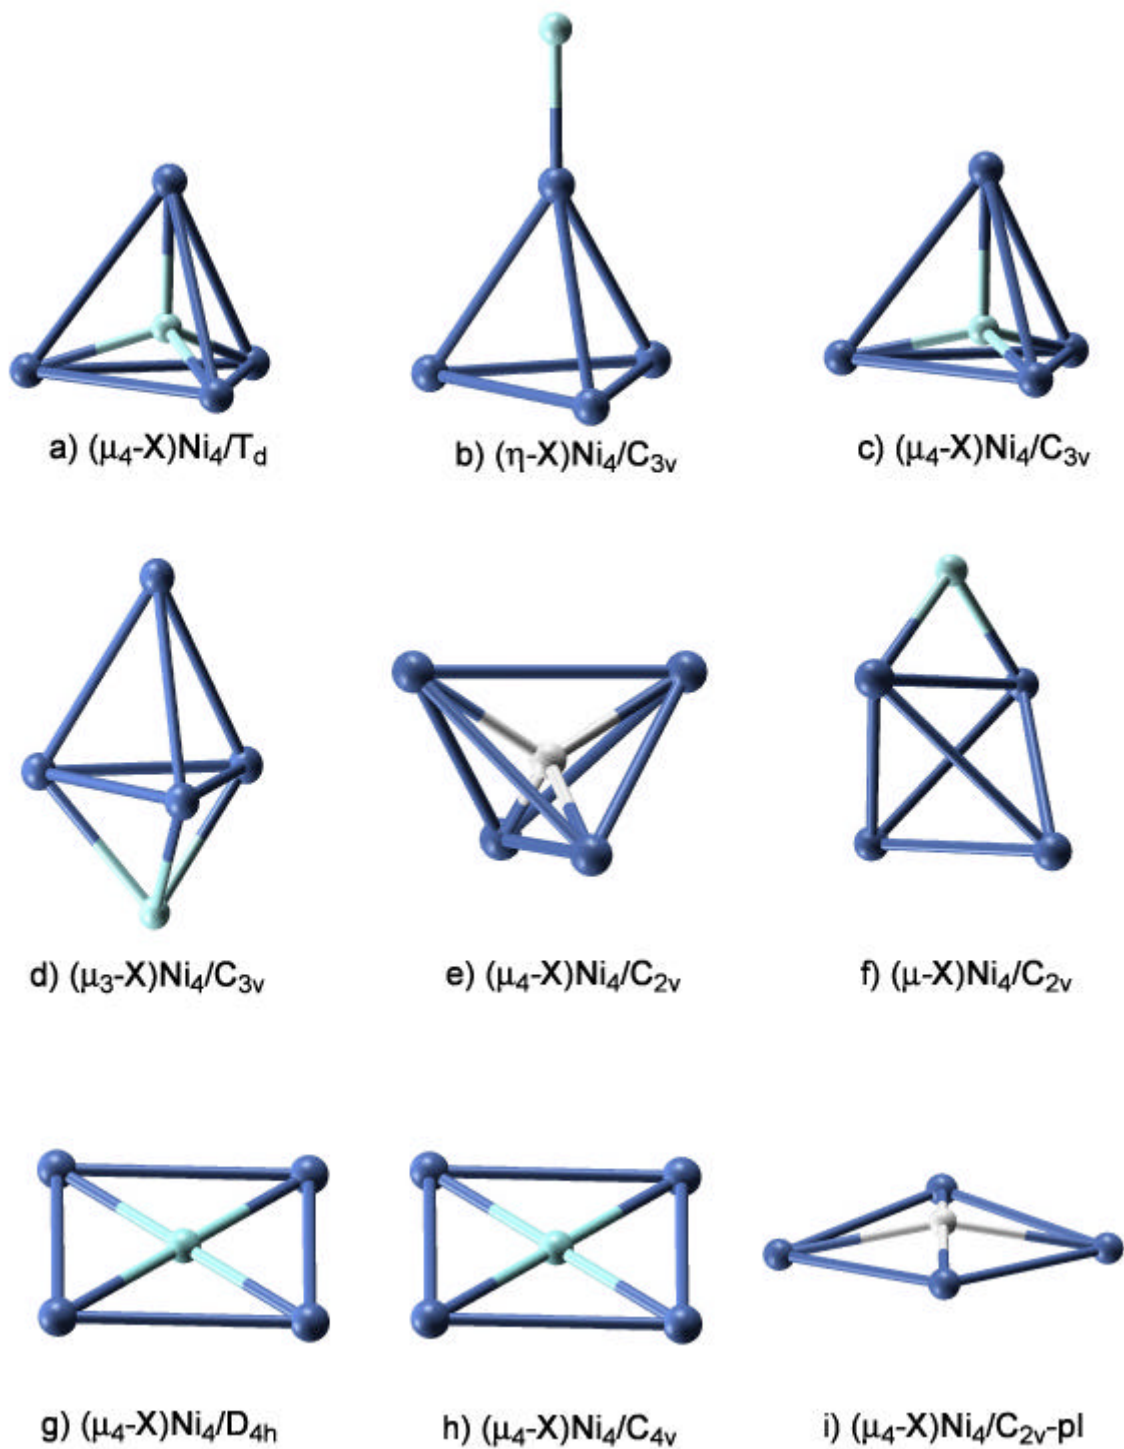

**Figure S1**

Initial structures for search of the location of the impurity atoms on the clusters.

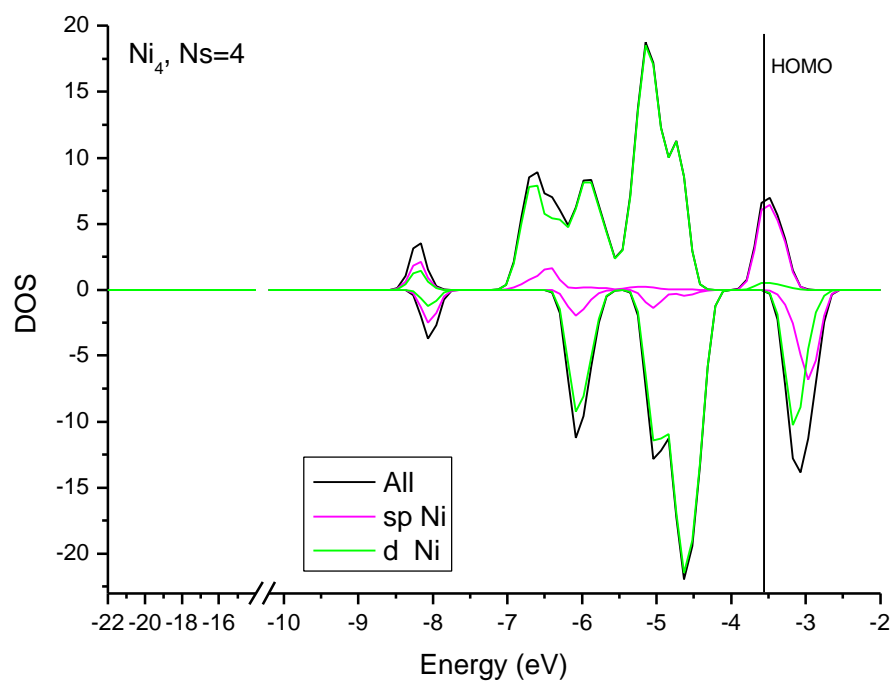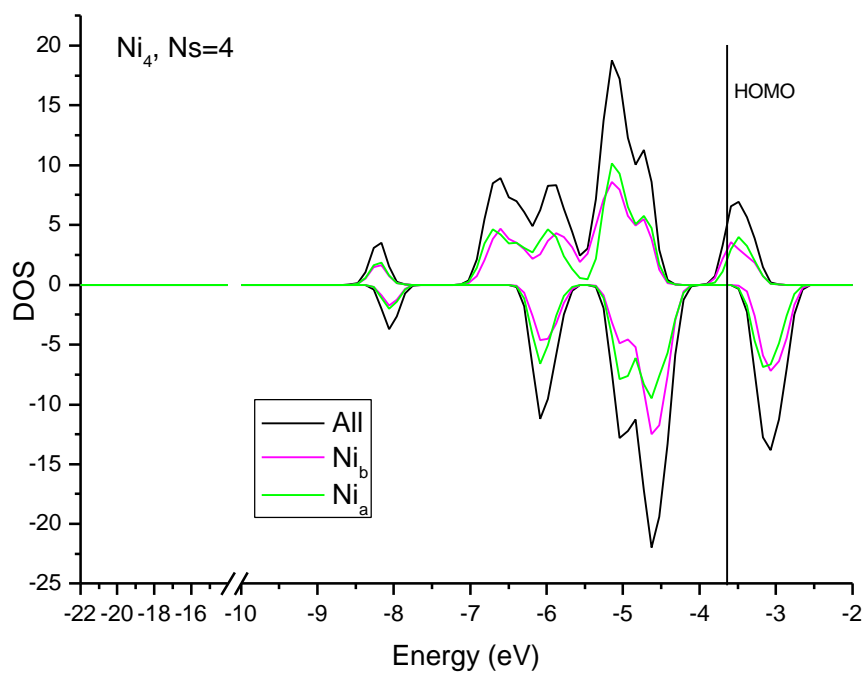

**Figure S2**  
Density of states (DOS) for bare  $\text{Ni}_4/\text{C}_{2v}$

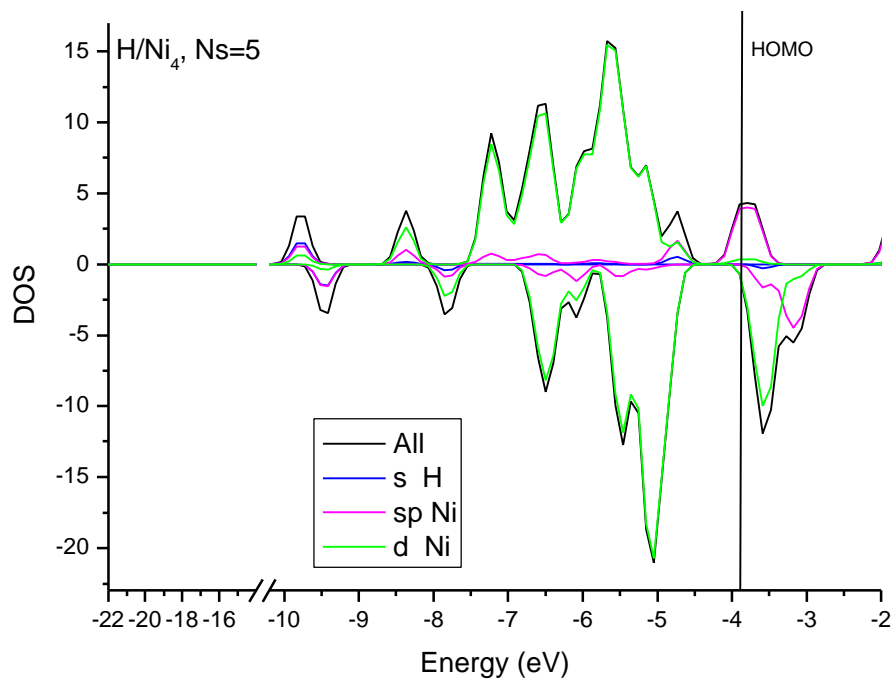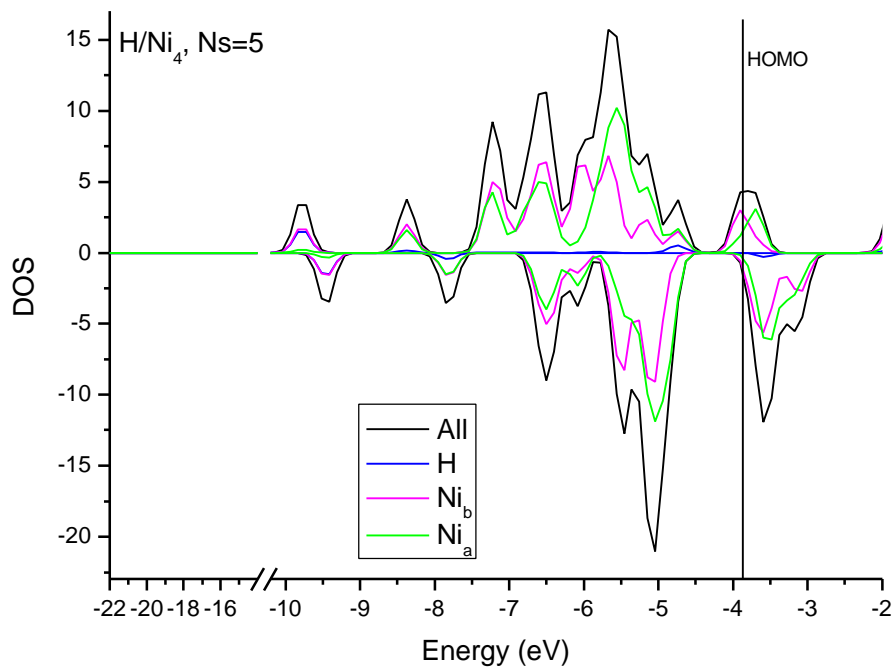

**Figure S3**

Density of states (DOS) for  $(\mu\text{-H})\text{Ni}_4/\text{C}_{2v}(5)$ .

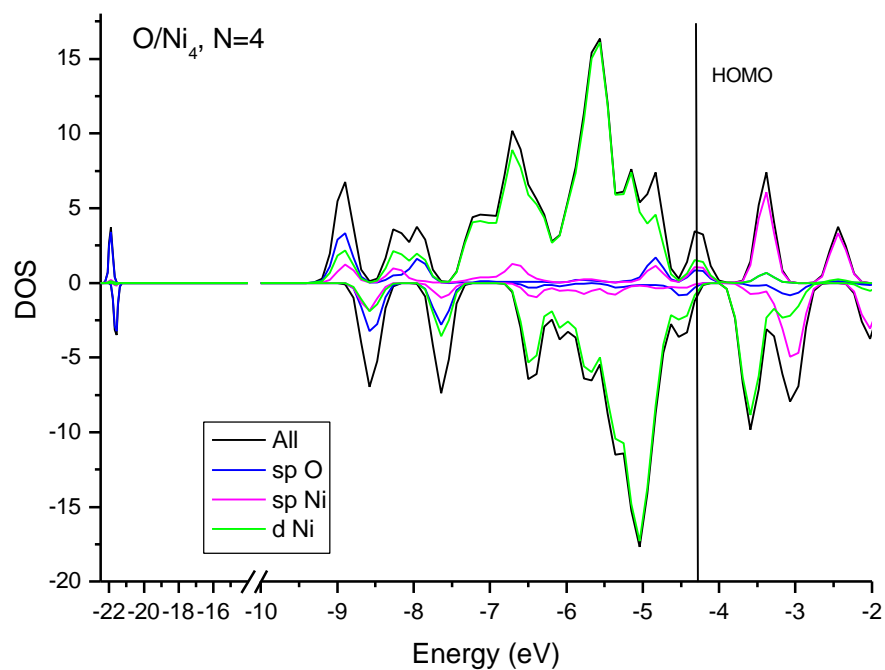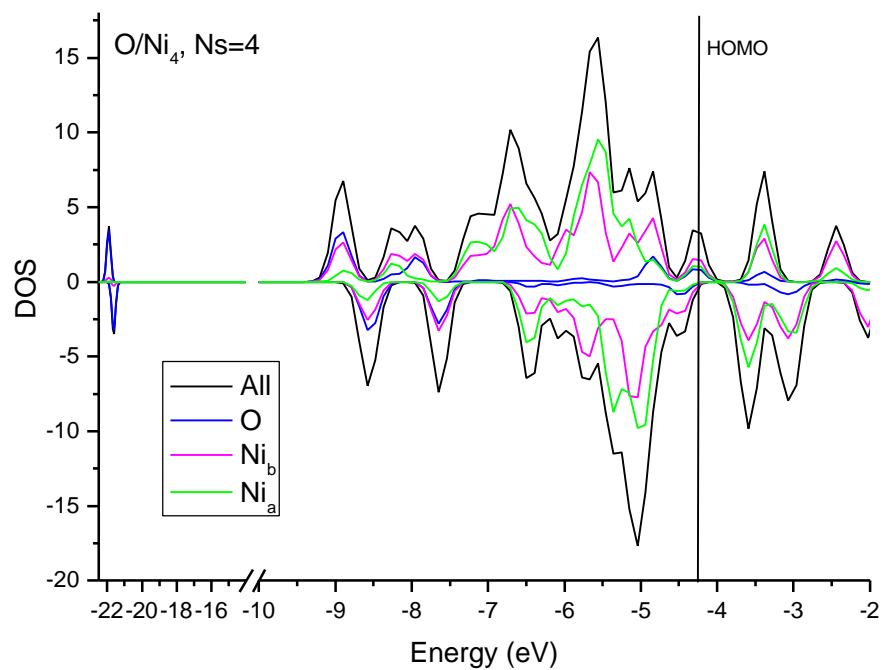

**Figure S4**

Density of states (DOS) for  $(\mu\text{-O})\text{Ni}_4/\text{C}_{2v}$ .

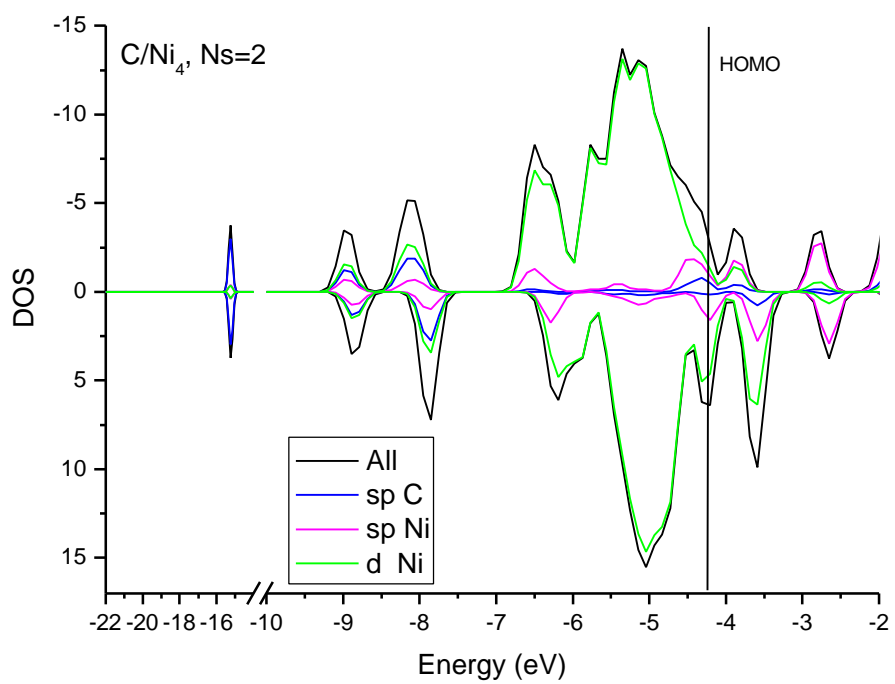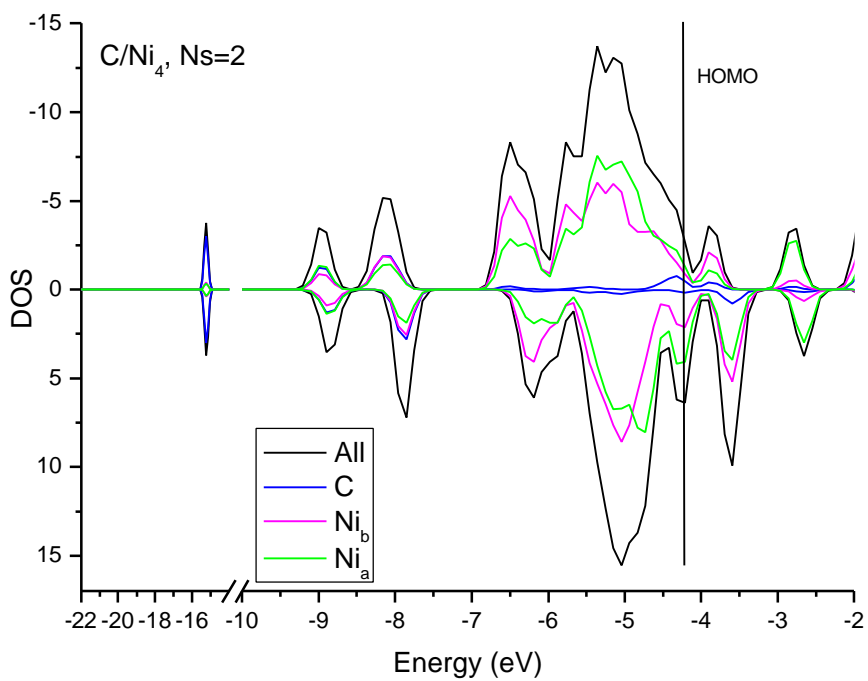

**Figure S5**  
Density of states (DOS) for  $(\mu_4\text{-C})\text{Ni}_4/\text{C}_{2v}$ .
